1 **Cell adhesion and immune response, two main functions altered in the transcriptome**  
2 **of seasonally regressed testes of two mammalian species**

3

4 **Running title:** Conserved mechanisms in testis regression

5

6 Francisca M. Real<sup>1,2</sup>, Miguel Lao-Pérez<sup>1</sup>, Miguel Burgos<sup>1</sup>, Stefan Mundlos<sup>2</sup>, Darío G.

7 Lupiáñez<sup>3</sup>, Rafael Jiménez<sup>1</sup>, and Francisco J. Barrionuevo<sup>1</sup>

8

9 <sup>1</sup> Departamento de Genética e Instituto de Biotecnología, Centro de Investigación Biomédica,  
10 Universidad de Granada, Armilla, Granada, Spain.

11 <sup>2</sup> RG Development & Disease, Max Planck Institute for Molecular Genetics, Berlin, Germany

12 <sup>3</sup> Epigenetics and Sex Development Group, Berlin Institute for Medical Systems Biology, Max-  
13 Delbrück Center for Molecular Medicine, Berlin, Germany.

14

15 **Correspondence:**

16 Rafael Jiménez and Francisco J. Barrionuevo. Departamento de Genética e Instituto de  
17 Biotecnología, Lab. 127, Centro de Investigación Biomédica, Universidad de Granada,

18 Avenida del Conocimiento S/N, 18016 Armilla, Granada, Spain Email: [rjimenez@ugr.es](mailto:rjimenez@ugr.es) and  
19 [fjbarrio@go.ugr.es](mailto:fjbarrio@go.ugr.es).

20

21 Francisca M. Real and, Miguel Lao-Pérez should be considered joint first author

22 Rafael Jiménez, and Francisco J. Barrionuevo should be considered joint senior author

23

24

25

26 **Abstract**

27 In species with seasonal breeding, male specimens undergo substantial testicular regression  
28 during the non-breeding period of the year. However, the molecular mechanisms that control  
29 this biological process are largely unknown. Here, we report a transcriptomic analysis on the  
30 Iberian mole, *Talpa occidentalis*, in which the desquamation of live, non-apoptotic germ cells  
31 is the major cellular event responsible for testis regression. By comparing testes at different  
32 reproductive states (active, regressing and inactive), we demonstrate that the molecular  
33 pathways controlling the cell adhesion function in the seminiferous epithelium, such as the  
34 MAPK, ERK and TGF- $\beta$  signalling, are altered during the regression process. In addition,  
35 inactive testes display a global upregulation of genes associated with immune response,  
36 indicating a selective loss of the “immune privilege” that normally operates in sexually active  
37 testes. Interspecies comparative analyses using analogous data from the Mediterranean pine  
38 vole, a rodent species where testis regression is controlled by halting meiosis entry, revealed  
39 a common gene expression signature in the regressed testes of these two evolutionary  
40 distant species. Our study advances in the knowledge of the molecular mechanisms  
41 associated to gonadal seasonal breeding, highlighting the existence of a conserved  
42 transcriptional program of testis involution across mammalian clades.

43

44 **Keywords:** Seasonal reproduction; Seasonal testis regression; Testis transcriptome; Cell  
45 adhesion; immune response; *Talpa occidentalis*; *Microtus duodecimcostatus*.

46

47

48

## 49 **Research Highlights**

50 By comparing the transcriptomes of the testes from males of the iberian mole, *Talpa*  
51 *occidentalis* (order Eulipotyphla), captured at different stages of the seasonal breeding cycle  
52 of this species, we show that two main functions are altered during seasonal testis regression:  
53 cell adhesion and immune response. The fact that the same functions are also altered in the  
54 Mediterranean pine vole, *Microtus duodecimcostatus* (order Rodentia), evidences the  
55 existence of a conserved transcriptional program of testis regression across mammalian  
56 clades.

57

## 58 **Introduction**

59 In temperate zones of the Earth, most species reproduce during the season that offers the  
60 best conditions for breeding success. In the transition period between the reproductive and the  
61 non-reproductive seasons, the gonads of both sexes undergo substantial changes, whose  
62 nature is species-specific (Jiménez et al., 2015). In females, ovaries entry in anoestrus (Das &  
63 Khan, 2010) and sexual receptivity is either reduced or abolished, as shown in the musk shrew,  
64 *Suncus murinus* (Temple, 2004). In males of several species, a process of testis regression  
65 takes place by which gonad volume is remarkably reduced and spermatogenesis is arrested,  
66 as described in the Syrian hamster, *Mesocricetus auratus* (Seco-Rovira et al., 2015; Martínez-  
67 Hernández et al., 2020), the black bear, *Ursus americanus* (Tsubota et al., 1997), the Iberian  
68 mole, *Talpa occidentalis* (Dadhich et al., 2010; Dadhich et al., 2013), the large hairy armadillo  
69 *Chaetophractus villosus* (Luaces et al., 2013), the wood mouse, *Apodemus sylvaticus*  
70 (Massoud et al., 2021) and the Mediterranean pine vole, *Microtus duodecimcostatus* (Lao-  
71 Pérez et al., 2021), among others.

72

73 Seasonal breeding relies on circannual modulations of the main regulator of the reproductive  
74 system, the hypothalamic–pituitary–gonadal (HPG) axis. In sexually active males the  
75 gonadotropin-releasing hormone, GnRH, which is secreted by the hypothalamus, induces the  
76 hypophysis (pituitary) to produce and secrete gonadotropic hormones (luteinizing hormone,  
77 LH, and follicle-stimulating hormone, FSH) which, in turn, activates both the production of  
78 steroids by Leydig cells and the spermatogenic cycle. Environmental cues modulate the  
79 function of this axis, being the photoperiod by far the best known, although other factors, such  
80 as food and water availability, stress and weather, can either modify or even overcome the  
81 influence of photoperiod (Bronson & Heideman, 1994; Nelson et al., 1995; Martin et al.,  
82 1994). In the non-reproductive season, these environmental cues alter the levels of HPG axis  
83 hormones, resulting in reduced levels of serum gonadotropins and circulating testosterone,  
84 leading to alterations of the spermatogenic cycle and, most frequently, to a halt in gamete  
85 production (Dardente et al., 2016).

86

87 For many years, germ cell apoptosis was considered to be the only cellular process  
88 responsible for germ cell depletion during seasonal testis regression (Young & Nelson, 2001;  
89 Pastor et al., 2011). However, more recently, alternative mechanisms have been reported,  
90 including germ cell desquamation (Dadhich et al., 2013; Luaces et al., 2014; Massoud et al.,  
91 2018) and a combination of apoptosis and autophagy (González et al., 2018). Despite this,  
92 the genetic control of these testicular changes are poorly understood. Expression profiling  
93 studies provide both an integrated view of the interacting molecular pathways operating in the  
94 testis and relevant information about which of them are altered during seasonal testis  
95 regression. The transcription profile of active and inactive testes of seasonal breeding males  
96 have been studied in some few mammalian species using either microarray, as in the Syrian  
97 hamster, *Mesocricetus auratus* (Maywood et al., 2009) or RNA-seq technology, as in the

98 European beaver, *Castor fiber* (Bogacka et al., 2017), the plateau pika, *Ochotona curzoniae*  
99 (Wang et al., 2019) and the Mediterranean pine vole, *Microtus duodecimcostatus* (Lao-Pérez  
100 et al., 2021). However, the number and identity of the deregulated genes vary substantially  
101 from study to study, mainly due to differences in either the profiling technologies used or the  
102 bioinformatic analysis performed. Hence, more species have to be investigated in order to  
103 identify evolutionarily conserved transcriptomic alterations related to seasonal testis  
104 regression.

105 The Iberian mole, *Talpa occidentalis*, develop sexual features that are unique among  
106 mammals, as females consistently develop bilateral ovotestes (gonads with both ovarian and  
107 testicular tissue) instead of normal ovaries (Jimenez et al., 1993; Barrionuevo et al., 2004). In  
108 addition, moles are strict seasonal breeders. In southern Iberian Peninsula, reproduction  
109 occurs during the autumn-winter period (October-March) whereas spring-summer (April-  
110 September) is the quiescence season. In summer, circulating testosterone levels are reduced  
111 and the regressed testis shrinks to one-fourth of their winter volume and mass. This testis  
112 regression is mediated by desquamation of live, non-apoptotic germ cells occurring in spring  
113 (April-May). In the regressed (inactive) testes, spermatogonia continue entering meiosis, but  
114 spermatogenesis does not progress beyond the primary spermatocyte stage (pachytene), as  
115 meiotic cells are eliminated by apoptosis. Also, the expression and distribution of the cell-  
116 adhesion molecules in the seminiferous epithelium is altered, and the blood-testis barrier  
117 (BTB) becomes permeable (Dadhich et al., 2010; Dadhich et al., 2011; Dadhich et al., 2013).

118  
119 We have recently sequenced and annotated the genome of *T. occidentalis*, shedding light on  
120 the genomic changes and molecular adaptations that lead to female ovotestis formation (Real  
121 et al., 2020). Using this resource, we have now explored the genetic control of the changes  
122 that the testis of the Iberian mole undergoes during the process of testicular regression. By

123 performing a transcriptomic analysis of active, regressing and inactive testes, we demonstrate  
124 that biological processes such as extracellular matrix organization and cell junction assembly  
125 are affected during testis regression, as well as the molecular pathways that control these  
126 processes during normal testicular function, mainly the MAPK signalling pathway. We also  
127 found that inactive testes have lost the “immune privilege” (reduced immune response) that  
128 operates normally in active testes. Finally, we performed an inter-species comparative  
129 analysis against analogous datasets we reported for the Mediterranean pine vole (Lao-Pérez  
130 et al., 2021), finding that a large number of genes are commonly deregulated in the inactive  
131 testes of both species. These genes are enriched in pathways such as the MAPK and  
132 regulation of the immune response, indicating the existence of conserved molecular  
133 mechanisms of testis involution across seasonal breeding mammals.

134

## 135 **Material and methods**

### 136 *Animals*

137 Six adult males of Iberian mole were captured alive in poplar groves near the locality of  
138 Chauchina (Granada province, south-eastern Spain) at three key stages of the reproductive  
139 cycle, using the methods developed in our laboratory (Barrionuevo et al., 2004). Two animals  
140 were captured in December (reproductive season), two more in April (transition period when  
141 testis regression occurs) and the last two in July (non-reproductive season). Animals were  
142 dissected, and the testes were removed under sterile conditions. The gonads were weighed,  
143 and frozen in liquid nitrogen for mRNA purification and further RNA-seq studies. An slice of one  
144 of the testis of every animal was fixed in 50 volumes of 4% paraformaldehyde overnight at 4°C,  
145 embedded in paraffin and processed for histology and immunofluorescence. Animals were  
146 captured with the permission of the Andalusian environmental authorities (Consejería de

147 Agricultura, Pesca y Medio Ambiente) following the guidelines and approval of both the Ethical  
148 Committee for Animal Experimentation of the University of Granada and the Andalusian Council  
149 of Agriculture and Fisheries and Rural Development (Registration number: 450-19131; June  
150 16th, 2014).

#### 151 *Immunofluorescence*

152 Testis sections were deparaffinized and incubated with primary antibodies overnight, washed,  
153 incubated with suitable conjugated secondary antibodies at room temperature for 1 hr and  
154 counter-stained with 4',6-diamino-2-phenylindol (DAPI). We used a Nikon Eclipse Ti microscope  
155 equipped with a Nikon DS-Fi1c digital camera (Nikon Corporation, Tokyo, Japan) to take  
156 photomicrographs. In negative controls, the primary antibody was omitted. The primary  
157 antibodies used were goat-anti-DMC1 (Santa Cruz Biotechnology, CA, sc-8973; 1:100) and  
158 rabbit-anti-DMRT1 (a kind gift from Sivana Guioli, 1:200).

#### 159 *RNA-seq*

160 Total RNA was isolated from both testes of the two males captured in every time point using  
161 the Qiagen RNeasy Midi kit following the manufacturer's instructions. After successfully  
162 passing quality check, the RNAs samples were paired-end sequenced separately in an  
163 Illumina HiSeq 2500 platform at the Max Planck Institute for Molecular Genetics facilities in  
164 Berlin, Germany.

#### 165 *Bioinformatics*

166 The quality of the resulting sequencing reads was assessed using FastQC (<http://www.bioinformatics.bbsrc.ac.uk/projects/fastqc/>). The RNA-seq reads were mapped to the  
167 recently published genome of *T. occidentalis* (Real et al., 2020) with the *align* and *featureCounts*  
168 function from the R subread package (Liao et al., 2019). Most meiotic and postmeiotic germ

170 cell types (from primary spermatocyte to spermatozoa) are exclusive of the active testes, being  
171 completely absent in inactive ones. Thus, many genes expressed in germ cells would appear  
172 as overexpressed in sexually active testes as such results would not reflect changes in gene  
173 expression but only differences in cell contents between active and inactive testes. Such an  
174 over-representation of germ-cell specific transcripts in active testes would mask changes in  
175 gene expression of somatic cells, which do exert the control of the spermatogenic cycle, in  
176 particular Sertoli cells. Hence, to normalize the data and focus on the study of gene expression  
177 in somatic cells, we decided to remove transcripts expressed in germ cells from the General  
178 Feature Format (GFF) file of the Iberian mole that we have recently generated (Real et al.,  
179 2020). For this, we used previously published cell signatures in single cell RNA sequencing  
180 studies (scRNA-seq) (Hermann et al., 2018; Green et al., 2018), as described in Lao-Pérez et  
181 al (Lao-Pérez et al., 2021). We removed all genes included in clusters 1-13 and 16 from the  
182 Hermann et al. (Hermann et al., 2018) study, belonging to different germ cell types, and those  
183 from spermatogonia, spermatocyte, round spermatid, and elongating spermatid from the Green  
184 et al. (Green et al., 2018) one. After doing this, the number of genes analysed decreased from  
185 13474 (Supporting Table S1) to 8300 (Supporting Table S3). Analysis of differential gene  
186 expression was performed with edgeR (Robinson et al., 2010). Genes were filtered by  
187 expression levels with the filterByExpr function, and the total number of reads per sample was  
188 normalized with the calcNormFactors function. Genes were considered to be differentially  
189 expressed at  $P_{\text{adjust}} < 0.05$  and  $|\log_{2}FC| > 1$ . GO analysis was performed with the enrich GO  
190 function of the clusterProfiler bioconductor package (Yu et al., 2012). General terms and terms  
191 not related with testicular functions were not displayed.

192

## 193 **Results**



194

195 **The expression of genes controlling cell adhesion and immune response are altered in**  
196 **the regressed testes of *T. occidentalis***

197 As we reported previously (Dadhich et al., 2010); Dadhich et al., 2013), the testes of Iberian  
198 mole males captured in the breeding period (autum and winter) were four times larger than  
199 those of males captured in the non-breeding period (spring and summer; Figure 1A). These  
200 inactive testes contained seminiferous tubules very reduced in diameter and lacked a well  
201 developed germinative epithelium, as spermatogenesis was arrested at the primary  
202 spermatocyte stage (Supporting Figure 1). To find differences in gene expression, we  
203 performed RNA-seq on active and inactive testes of *T. occidentalis*. Multidimensional scaling  
204 plot showed that replicate samples of the same breeding season clustered together, indicating  
205 consistent differences in the testis transcriptome between the breeding and the non-breeding  
206 periods (Supporting Figure 2). Before normalization for differences in germ cell contents  
207 between active and inactive testes, differential expression analysis of RNA-seq data revealed  
208 7049 differentially expressed genes (DEGs) between the two breeding periods, from which  
209 3365 were upregulated (up-DEGs) and 3684 downregulated (down-DEGs) in the regressed  
210 testes (FDR < 0.05 and  $|\log_2FC| > 1$ ; Supporting Figure 3; Supporting Table S1). GO analysis  
211 of these DEGs showed a significant enrichment (P<sub>adjust</sub> < 0.05) in a number of categories,  
212 many of them associated to biological processes occurring during spermatogenesis and  
213 spermiogenesis, including “cilium organization” (GO:0044782; P<sub>adjust</sub> =  $1.9 \times 10^{-6}$ ),  
214 “microtubule-based movement” (GO:0007018; P<sub>adjust</sub> =  $8 \times 10^{-4}$ ), spermatogenesis  
215 (GO:0007283; P<sub>adjust</sub> =  $1.7 \times 10^{-3}$ ) and “sperm motility” (GO:0097722; P<sub>adjust</sub> =  $6.8 \times 10^{-3}$ )  
216 among others (Supporting Figure 3; Supporting Table S2). These results evidence the need for  
217 a normalization of the data, as most of these GO terms are related to cell contents differences

218 between active and inactive testes, rather than to actual gene expression alterations during  
219 testis regression. After normalization, the distance between active and inactive samples was  
220 reduced in the multidimensional scaling plot (Supporting Figure 2), indicating that our approach  
221 removed in fact differences derived from the distinct germ cell contents between active and  
222 inactive testes. In the normalized set of genes, we identified 4327 DEGs, from which 2055  
223 were up-DEGs and 2272 were down-DEGs (Figure 1B; Supporting Table S3). GO analysis of  
224 DEGs and down-DEGs showed very few significant categories ( $P_{\text{adjust}} < 0.05$ ; Supporting  
225 Table S4-5). In contrast, for the up-DEGs we found terms related to the cell adhesion function  
226 of the seminiferous epithelium, including “regulation of cell adhesion” (GO:0030155;  $P_{\text{adjust}} =$   
227  $2 \times 10^{-4}$ ), “extracellular matrix organization” (GO:0030198;  $P_{\text{adjust}} = 3 \times 10^{-4}$ ), “cell junction  
228 assembly” (GO:0034329;  $P_{\text{adjust}} = 2.9 \times 10^{-3}$ ), and “cell-matrix adhesion” (GO:0007160;  
229  $P_{\text{adjust}} = 3 \times 10^{-2}$ ), among others (Figure 1C; Supporting Table S6). We next searched for  
230 enriched GO terms related to molecular pathways and we found several GO terms related to  
231 Sertoli cell signalling involved in the regulation of spermatogenesis and BTB dynamics,  
232 including “MAPK cascade” (GO:0000165;  $P_{\text{adjust}} = 4 \times 10^{-3}$ ) (Ni et al., 2019) “positive regulation  
233 of small GTPase mediated signal transduction” (GO:0051057;  $P_{\text{adjust}} = 3 \times 10^{-2}$ ; Lui et al.,  
234 2003b), “ERK1 and ERK2 cascade” (GO:0070371,  $P_{\text{adjust}} = 2 \times 10^{-3}$ ; Zhang et al., 2014),  
235 “regulation of cytosolic calcium ion concentration” (GO:0051480;  $P_{\text{adjust}} = 2 \times 10^{-2}$ ; Gorczynska  
236 & Handelsman, 1995), “response to transforming growth factor beta” (GO:0071559;  $P_{\text{adjust}} =$   
237  $9 \times 10^{-3}$ ; Ni et al., 2019), “Notch signaling pathway” (GO:0007219;  $P_{\text{adjust}} = 1 \times 10^{-3}$ ; Garcia et  
238 al., 2013), and “canonical Wnt signaling pathway” (GO:0060070;  $P_{\text{adjust}} = 4 \times 10^{-2}$ ; Wang et al.,  
239 2019) (Figure 1C; Supporting Table S6). Gene-concept analysis using these data resulted in a  
240 large network in which MAPK/ERK1/2 signalling occupied a central position sharing many  
241 genes with the other molecular pathways and with the biological process “cell-cell adhesion”  
242 (Figure 1D).

243 The GO analysis of up-DEGs also revealed an enrichment of genes participating in the  
244 immune response (Figure 1C; Supporting Table S6)) including “positive regulation of NF-  
245 kappaB transcription factor activity” (GO:0051092; P<sub>adjust</sub> =  $2 \times 10^{-3}$ ), “macrophage activation”  
246 (GO:0042116; P<sub>adjust</sub> =  $1 \times 10^{-2}$ ), “response to tumor necrosis factor” (GO:0034612; P<sub>adjust</sub> =  
247  $4 \times 10^{-2}$ ), “positive regulation of leukocyte activation” (GO:0002696; P<sub>adjust</sub> =  $3.9 \times 10^{-2}$ ),  
248 “regulation of inflammatory response” (GO:0050727;  $1.6 \times 10^{-3}$ ) and “response to cytokine”  
249 (GO:0034097; P<sub>adjust</sub> =  $3 \times 10^{-8}$ ). Gene-concept analysis using these data generated a  
250 network in which both TNF and NF-Kappa signalling share many genes with biological  
251 processes involved in the activation of the immune system (Figure 1E).

252

### 253 **Transcriptome alterations at the onset of testis regression in *Talpa occidentalis***

254 Our previous analysis revealed that several molecular pathways are altered in inactive  
255 testes when compared to the active ones. However, as these stages represent end-points of  
256 the activation-regression cycle, the results might not be indicative of the biological processes  
257 that are causative of testis regression. In the population we investigated, males of the Iberian  
258 mole undergo testis regression during the months of March and April, when seminiferous  
259 tubules shrink due to the germinative epithelium disorganization caused by a massive  
260 desquamation of live meiotic and post-meiotic germ cells (Figure 2A-C; Dadhich et al., 2010;  
261 Dadhich et al., 2013). Therefore, we also captured moles in April and generated transcriptomes  
262 from inactivating (regressing) testes. Multidimensional scaling plot showed that replicate  
263 samples of the same reproductive season clustered together, the inactivating samples being  
264 located between the active and the inactive ones. In this plot, the separation between active  
265 and inactivating testes was shorter than that between inactivating and inactive ones, confirming  
266 that we obtained transcriptomes corresponding to testes that were likely initiating the regression

267 process (Figure 2D). Differential expression analysis between active and inactivating testes  
268 identified 452 DEGs, from which 207 were upregulated and 245 downregulated in the samples  
269 of the inactivating testes ( $FDR < 0.05$  and  $|\log_2FC| > 1$ ; Figure 2E; Supporting Table S7), a  
270 number much smaller than that of DEGs identified between active and inactive testes (see  
271 above). From these 452 DEGs, 446 were also differentially expressed between active and  
272 inactive testes. Almost all genes found to be downregulated in one comparison  
273 (active/inactivating) were also downregulated in the other one (active/inactive), and the same  
274 happened with the upregulated genes (Figure 2F; see  $\log_2FC$ s in Supporting Table S8). In  
275 general, the amplitude of the changes in gene expression observed in the comparison  
276 active/inactive was greater than that in the active/inactivating one (Figure 2F, note that the  
277  $\log_2FC$ s vary between -5 and 9 in the first case (x-axis), and between -3 and 3 in the second  
278 one (y-axis); Supporting Table S8). Accordingly, the magnitude of the expression changes in  
279 most genes ( $|\log_2FC|$ ) was greater in the active/inactive comparison than in the  
280 active/inactivating one (red dots in Figure 2F; Supporting Table S8). GO analysis using either  
281 all the DEGs or just the downregulated genes identified in the active/inactivating comparison  
282 testes revealed no significant enriched category. Contrarily, in the upregulated genes we found  
283 a significant enrichment ( $P_{adjust} < 0.05$ ) in a number of biological processes (Figure 2G;  
284 Supporting Table S9), related to epithelium development, cell migration, wound healing and  
285 vasculogenesis (Fig 2G). We did not find any significantly enriched GO term associated to  
286 signalling pathways. So, we decided to search for DEGs between active and inactivating testes  
287 in the molecular pathways identified in the previous analysis (Figure 1E; Supporting Table S4).  
288 We found 29 genes belonging to “MAPK cascade” (GO:0000165), 14 genes to the “ERK1 and  
289 ERK2 cascade” (GO:0070371), 11 to “response to transforming growth factor beta”  
290 (GO:0071559), 11 to “regulation of small GTPase mediated signal transduction” (GO:0051056;  
291 Supporting Table S10), 7 to “regulation of cytosolic calcium ion concentration” (GO:0051480),

292 and 6 to “Notch signaling pathway” (GO:0007219). In addition we found 27 genes altered in the  
293 category “cell-cell adhesion” (GO:0098609). Gene-concept analysis using these data revealed  
294 an interacting network with many of these genes shared by several categories (Figure 2H).  
295 Altogether, these results suggest that the expression of genes belonging to several molecular  
296 pathways is altered at the beginning of testis regression, and that this alteration affects more  
297 genes (and probably more pathways) as the regression proceeds, thus ensuring the  
298 maintenance of the regressed status of the inactive testes of *T. occidentalis*. The MAPK/ERK1/2  
299 pathway seems to play an essential role in this process.

300

### 301 **Transcriptomic analysis of early spermatogenesis in the regressed testis of *Talpa*** 302 ***occidentalis***

303 We next investigate gene expression in the extant germ cells of the regressed testis.  
304 Consistent with our previous observations, double immunofluorescence for DMRT1, a marker  
305 of Sertoli and spermatogonial cells, and for DMC1, a marker for zygotene and early pachytene  
306 primary spermatocytes, revealed that spermatogonia maintain active proliferation in inactive  
307 testes and that a small number of spermatocytes reach the early pachytene stage (Figure 3A,B;  
308 Dadhich et al., 2011). Because of this, we decided to study the cell-specific expression profile  
309 of the early stages of spermatogenesis in active and inactive testes of the Iberian mole. For  
310 this, we used the gene expression signature of spermatogenic clusters reported by Hermann  
311 et al. (Hermann et al., 2018), assigning the genes we found to be differentially expressed  
312 between active and inactive testes to each of the early spermatogenic clusters, from  
313 undifferentiated spermatogonia to pachytene spermatocytes (Supporting Table S11). Within  
314 these clusters, the number of downregulated genes increased as spermatogenesis progressed,  
315 being predominant at the pachytene stage (Figure 3C). However, this is probably a

316 consequence of the much higher number of pachytene spermatocytes present in the active  
317 testis (see red cells in Figure 3 A, B), rather than a reflection of actual changes in gene  
318 expression within cells. Biological theme comparison of downregulated genes in the inactive  
319 testes within these clusters (excluding the pachytene cluster) revealed in spermatogonial cells  
320 an enrichment of terms associated to “protein polyubiquitination” (GO:0000209), “covalent  
321 chromatin modification” (GO:0016569), “regulation of chromosome organization”  
322 (GO:0033044) and “DNA methylation” (GO:0006306). From the differentiated spermatogonia  
323 stage on, we identified GO categories associated to meiosis, including “nuclear chromosome  
324 segregation” (GO:0098813) and “meiotic nuclear division” (GO:0140013) among others (Figure  
325 3 D; Supporting Table S12). As most of these latter biological processes are not completed in  
326 the inactive gonads, the differential expression detected for these genes is again probably a  
327 consequence of the different germ cell contents of active and inactive testes. Biological theme  
328 comparison of upregulated genes showed an enrichment in general biological processes such  
329 as “cotranslational protein targeting to membrane” (GO:0006613), “protein localization to  
330 endoplasmic reticulum” (GO:0070972) and “cellular respiration” (GO:0045333) among others  
331 (Figure 3E; Supporting Table S13). Overall, these results clearly show that polyubiquitination  
332 seems to be a function affected in spermatogonial cells during testis regression. However, our  
333 findings at later stages (early meiotic prophase) are less consistent as the detected alterations  
334 could probably be derived from the different germ cell contents of seasonally active and inactive  
335 testes of *T. occidentalis*.

336

337 **Several biological processes are commonly affected in the regressed testes of both**  
338 ***Talpa occidentalis* and *Microtus duodecimcostatus*.**

339 We have recently reported the changes that the testicular transcriptome of the  
340 Mediterranean pine vole, *Microtus duodecimcostatus*, undergo during its seasonal reproductive  
341 cycle in southeastern Iberian Peninsula (Lao-Pérez et al., 2021). The inactive testes of this  
342 species show a clear difference with those of the Iberian mole: meiosis initiation is completely  
343 stopped, so that no zygotene or pachytene cells are present in the regressed seminiferous  
344 tubules. To explore the similarities of testicular regression between moles and voles, which are  
345 representative species of the Eulipotyphla and Rodentia orders, respectively, we decided to  
346 compare our testis transcriptomic datasets. We initially searched for genes that were either  
347 upregulated or downregulated in the regressed testes in both species ( $FDR < 0.05$  and  
348  $|\log_2FC| > 1$ ), and identified 1529 genes, 900 of which were upregulated and 629 downregulated  
349 (Figure 4A-B and Supporting Table S14). For these genes, we plotted the  $\log_2FC$  of one species  
350 against the other one and found a linear correlation between both sets of data (Figure 4C;  
351 Pearson correlation test,  $cor.coeff = 0.85$ ;  $p\text{-value} < 2.2 \times 10^{-16}$ ), showing that many alterations  
352 in gene expression occur during the testis regression process of the two species. As expected,  
353 GO analysis of downregulated genes revealed a significant enrichment ( $P_{adjust} < 0.05$ ) in a  
354 reduced number of biological processes related to spermatogenesis and sperm differentiation  
355 (Supporting Table S15). In contrast, in the group of upregulated genes we identified many  
356 categories that were also detected in our previous analyses (Figure 4D; Supporting Table S16),  
357 including “cell-cell adhesion (GO:0098609;  $P_{adjust} = 1.7 \times 10^{-3}$ ) and “extracellular matrix  
358 organization” (GO:0030198;  $P_{adjust} = 1.2 \times 10^{-5}$ ). This analysis also reported enriched GO terms  
359 associated to the same molecular pathways identified separately in both species, such as  
360 “regulation of MAPK cascade” (GO:0043408;  $P_{adjust} = 9.3 \times 10^{-6}$ ), “response to transforming  
361 growth factor beta” (GO:0071559;  $P_{adjust} = 3.9 \times 10^{-4}$ ), “ERK1 and ERK2 cascade”  
362 (GO:0070371;  $P_{adjust} = 3.8 \times 10^{-4}$ ), and “regulation of cytosolic calcium ion concentration”  
363 (GO:0051480;  $P_{adjust} = 2 \times 10^{-2}$ ) (Figure 4D; Supporting Table S16). Gene-concept analysis



364 revealed a complex interacting network with genes shared by several categories (Figure 4E).  
365 Moreover, our GO analysis also identified several enriched categories related to the activation  
366 of the immune system (Figure 4D; Supporting Table S16), including “positive regulation of NF-  
367 kappaB transcription factor activity” (GO:0051092; Padjust =  $9 \times 10^{-4}$ ), “ cytokine production”  
368 (GO:0001816; Padjust =  $7 \times 10^{-7}$ ), “macrophage activation” (GO:0042116; Padjust =  $2 \times 10^{-3}$ ),  
369 “response to tumor necrosis factor” (GO:0034612;  $4 \times 10^{-2}$ ) and “leukocyte activation”  
370 (GO:0045321; Padjust =  $2 \times 10^{-7}$ ). Gene-concept analysis on these terms again revealed a  
371 cooperative network (Figure 4F), indicating that activation of the immune system is a common  
372 feature in the regressed testes of both species.

373

## 374 **Discussion**

375 We have previously reported the seasonal changes that the testes of *T. occidentalis*  
376 undergo at the histological, immunohistological and hormonal level (Dadhich et al., 2010;  
377 Dadhich et al., 2011; Dadhich et al., 2013). To deepen in the molecular mechanisms underlying  
378 these changes, we have analysed here the transcriptome of testes at different time points in  
379 the reproductive cycle of this species. We reported previously that, during the non-breeding  
380 season, male moles have reduced levels of serum testosterone and regressed testes in which  
381 spermatogenesis is arrested, expression of cell adhesion molecules is disrupted and the BTB  
382 is not functional (Dadhich et al., 2013). Consistent with this, our transcriptome study shows that  
383 biological processes such as “cell-cell adhesion” and “cell junction assembly” as well as several  
384 molecular pathways including MAPK, ERK1/2, TGF- $\beta$ , Cytosolic Ca<sup>2+</sup>, PI3K, GTPase, and TNF  
385 (which operate in Sertoli cells and are necessary for spermatogenesis), and the dynamics of  
386 tight and adherens junctions forming the BTB, are altered in the inactive testes of *T.*  
387 *occidentalis*. The mitogen-activated protein kinases (MAPKs) comprises a family of regulators



388 involved in the control of many physiological processes (Sun et al., 2015). There are three  
389 classical subfamilies of MAPKs, a) the extracellular signal-regulated kinases (ERKs), b) the c-  
390 Jun N-terminal kinases (JNKs), and c) the p38 MAPKs, all of which are known to regulate  
391 several aspects of the testicular function, including cell division and differentiation during  
392 spermatogenesis and junctional restructuring of the seminiferous epithelium (Sun et al., 1999);  
393 Wong & Yan Cheng, 2005; Ni et al., 2019). The MAPK/ERK1/2 pathway plays essential roles  
394 in modulating cell adhesion and motility in several epithelia, including adhesion-mediated  
395 signalling (Howe et al., 2002), cytoskeleton dynamics (Stupack et al., 2000), and junction  
396 disassembly (Wang et al., 2004). In the testis, the components of MAPK/ERK1/2 are found in  
397 Sertoli cells and all classes of germ cells in the seminiferous epithelium (Wong & Yan Cheng,  
398 2005), and regulates the formation of Sertoli–Sertoli and Sertoli–matrix anchoring junctions and  
399 the tight junction forming the BTB (Crépieux et al., 2001; Crépieux et al., 2002). This MAPK  
400 cascade also regulates the formation of ectoplasmic specialization (ES), structures that  
401 contribute to the adhesion between Sertoli cells at the BTB, and between Sertoli and developing  
402 spermatids at the adluminal compartment (Sun et al., 1999; Wong & Yan Cheng, 2005; Ni et  
403 al., 2019). We found 132 and 52 genes belonging to the MAPK and ERK1/2 pathways,  
404 respectively, upregulated in the inactive mole testes (Supporting Table S6, GO:0000165 and  
405 GO:0070371), and our gene-concept analysis showed that many of them are shared by these  
406 two pathways and by other processes, including cell junction assembly and regulation and  
407 cAMP mediated signaling (Figure 1F). As mentioned above, MAPK can also act through the  
408 p38 MAPK cascade (Engelberg, 2004). This subfamily is activated by different pathways,  
409 including GTPases, usually resulting in inflammatory responses or apoptosis. Members of the  
410 p38 MAPK pathway have been found in Sertoli cells and elongate spermatids, and play a role  
411 in controlling cell junction dynamics in the seminiferous epithelium (Wong & Yan Cheng, 2005).  
412 In Sertoli cells, this pathway is activated in the presence of TGF- $\beta$ 3, leading to disruption of the

413 tight-junction proteins in the BTB (Lui et al., 2003b; Lui et al., 2003a; C. Wong et al., 2004). Our  
414 transcriptomic analysis also revealed that the TGF- $\beta$  and the GTPase pathways are altered in  
415 the mole inactive testes (Figure 1F; Supporting Table S4). The different MAPK cascades are  
416 likely to act in concert to regulate the BTB dynamics that facilitates germ cell migration  
417 throughout the seminiferous epithelium during the spermatogenic cycle (Wong & Yan Cheng,  
418 2005), and several observations confirmed that these pathways are hormonally regulated.  
419 Testosterone can stimulate the MAPK/ERK signaling (Fix et al., 2004; Cheng et al., 2007) and  
420 low levels of this hormone, together with increased levels of TGF- $\beta$ 3, leads to the loss of cell  
421 adhesion molecules in the seminiferous epithelium, a process that seems to be mediated by  
422 different MAPK cascades (Wang et al., 2004; Wong & Yan Cheng, 2005). In the light of this  
423 knowledge, our current transcriptomic data strongly suggest that the reduced levels of  
424 testosterone that the Iberian mole undergoes during the inactive season leads to the activation  
425 of different MAPK signaling cascades in the testes, a fact that in concert with other molecular  
426 pathways, including GTPase, PI3-K and TGF- $\beta$  signaling, deregulates the cell adhesion  
427 function in the seminiferous epithelium, leading to BTB disruption and spermatogenic arrest.

428

429 As mentioned above, testis regression in *T. occidentalis* (April-May) implies the massive  
430 desquamation of live, non-apoptotic germ cells which is the main mechanism of seasonal  
431 germ cell depletion in this species. We found that most of the genes deregulated during this  
432 period do remain deregulated during the non-breeding period, although at a less significant  
433 level. Among them, we found genes involved in the regulation of pathways that control cell  
434 adhesion such as MAPK, ERK1/2, GTPase and TGF- $\beta$ , indicating that deregulation of these  
435 pathways is likely to be also involved in the massive germ cell desquamation that  
436 accompanies seasonal testis regression in the mole.

437 A special immunological environment referred to as “immune privilege” operates in  
438 functional testes and protect germ cells from autoimmune attack. There are three main factors  
439 contributing to this immune privilege: a) the existence of the BTB, which isolates meiotic and  
440 postmeiotic germ cells from the cells of the immune system, b) the reduced capacity of the  
441 testicular macrophages to mount an inflammatory response, and c) the production of anti-  
442 inflammatory cytokines by somatic cells (reviewed in (Fijak & Meinhardt, 2006; Li et al., 2012;  
443 Zhao et al., 2014). Our transcriptomic analysis revealed that categories related to  
444 immunological processes including “inflammatory response” “leukocyte activation”  
445 “macrophage activation” and “response to cytokine”, were altered in the inactive testes of *T.*  
446 *occidentalis*, as well as molecular pathways that regulate the immune system, such as NF-  
447 kappaB and TNF, denoting the activation of the immune system in the inactive testes of *T.*  
448 *occidentalis*. Under normal physiological conditions, testicular macrophages present a reduced  
449 capability to mount inflammatory responses and to produce cytokines, when compared with  
450 macrophages from other tissues. Our RNA-seq data revealed both the activation of the  
451 macrophage population and cytokine production in the inactive testes of the Iberian mole and  
452 that TNF and NF-KappaB, two molecular pathways involved in the regulation of inflammatory  
453 cytokines production (Hayden & Ghosh, 2014), operate in the inactive testis. Several studies  
454 evidence an immunosuppressive role of testosterone on different components of the immune  
455 system (Trigunaite et al., 2015; Foo et al., 2017), so that testicular testosterone induces a  
456 reduction of pro-inflammatory cytokines in macrophages (D’agostino et al., 1999). Taking all  
457 these observations into account, we suggest that low levels of testosterone in the regressed  
458 testes of *T. occidentalis* may lead to the loss of the “immune privilege”, which is manifested by  
459 BTB permeation and increased cytokine production by the macrophage population (and  
460 perhaps other somatic cells). Altogether, these processes might contribute to maintain the  
461 quiescent status of the mole gonads during the non-breeding period.

462

463 We also analysed the expression profile of genes belonging to the genetic expression  
464 signature of early spermatogenic cell populations (Supporting Table S11), and found that  
465 several biological processes are altered in the regressed testes of the Iberian mole, particularly  
466 protein ubiquitination at the spermatogonia stage (Fig. 3D; Supporting Tables S12,13).  
467 Ubiquitination is essential for the establishment of both spermatogonial stem cells and  
468 differentiating spermatogonia and it is also involved in the regulation of several key events  
469 during meiosis, including homologous recombination and sex chromosome silencing (Bose et  
470 al., 2014). Indeed, mutations in the ubiquitin specific protease 26 (USP26), which is expressed  
471 in Leydig cells and early spermatogonia (Wosnitzer et al., 2014), are associated with defective  
472 spermatogenesis and infertility in both human and mice (Paduch et al., 2005) (Sakai et al.,  
473 2019). Testosterone supports spermatogenesis through three mechanisms: a) maintaining the  
474 BTB integrity (Meng et al., 2011), b) regulating Sertoli cell-spermatid adhesion (Holdcraft &  
475 Braun, 2004), and c) controlling the release of mature sperm (Holdcraft & Braun, 2004). All  
476 these actions are mediated by Sertoli cells, as germ cells do not express the androgen receptor  
477 (AR) and, thus, are not direct targets of testosterone. In this study we reveal that gene  
478 expression seems to be altered in the spermatogonial cells of the inactive mole testes, although  
479 it is difficult to know whether this is caused either by the particular testicular environment of  
480 quiescent testes, in which both the BTB and the cell adhesion function are disrupted, or by  
481 currently unknown mechanisms directly affecting germ cell expression, or both.

482 Finally, we have compared the mole testicular transcriptomic data with those we recently  
483 reported for the Mediterranean pine vole. We found a large number of genes that are  
484 deregulated in the regressed testes of both species, with two remarkable coincidences: 1) many  
485 of these genes are involved in the control of cell adhesion (Figure 4B,C; Supporting Tables

486 S14,15) and, accordingly, molecular pathways such as MAPK, ERK1/2, TGF- $\beta$ , GTPase, and  
487 TNF, which control cell junctions in the seminiferous epithelium, are deregulated in the two  
488 species; 2) we also found a shared set of genes involved in the regulation of the immune  
489 response. These coincidences are relevant if we consider that the inactive testes of these two  
490 species do not show identical features. For example, meiosis initiation by spermatogonia is  
491 completely abolished in the inactive testes of *M. duodecimcostatus* (Lao-Pérez et al., 2021),  
492 but not in those of *T. occidentalis*, where meiosis entry continues and spermatogenesis  
493 progresses until the early primary spermatocyte stages (Dadhich et al., 2010; Dadhich et al.,  
494 2013). Moreover, the inactive seminiferous tubules of *M. duodecimcostatus* remain adjacent to  
495 each other (Lao-Pérez et al., 2021), whereas those of *T. occidentalis* become widely separated  
496 from each other by intervening Leydig cells (Lao-Pérez et al., 2021; Dadhich et al., 2013).  
497 Despite these differences, here we report that two important testicular functions, cell adhesion  
498 and immune response, are altered in the inactive testes of these two species, suggesting that  
499 these are conserved molecular mechanisms associated to seasonal testis involution in  
500 mammals.

501

## 502 **Acknowledgements**

503 The authors thank Dr. Slivana Guioli for kindly providing us with the DMRT1 antibody used in  
504 this study.

505

## 506 **Competing interests**

507 The authors declare no competing or financial interests.

508

509 **Author contributions**

510 Conceptualization: R.J., F.B., F.M.R., D.L., S.M.; Methodology: F.M.R., M.L; Software: F.J.,  
511 M.B.; Formal analysis: F.M.R., M.L, F.B., R.J.; Investigation: R.J., F.B., F.M.R., D.L., M.L.;  
512 Writing -original draft: F.B., R.J.; Writing -review & editing: R.J., F.B., F.M.R., D.L., S.M.;  
513 Visualization: F.B., F.M.R., D.L. ; Funding acquisition: R.J., F.B., F.M.R., D.L., S.M.

514

515 **Funding**

516 This research was funded by the following sources: Spanish Secretaría de Estado de  
517 Investigación, Desarrollo e Innovación, Ministerio de Economía y Competitividad (grant  
518 number CGL-2015-67108-P), Junta de Andalucía (grant number BIO109), Deutsche  
519 Forschungsgemeinschaft (grant numbers MU 880/15-1 and MU 880/27-1), and Helmholtz  
520 ERC Recognition Award grant from the Helmholtz-Gemeinschaft (ERC-RA-0033).

521

522 **Data Availability Statement**

523 The data that support the findings of this study are openly available in ArrayExpress at  
524 <https://www.ebi.ac.uk/arrayexpress/>, reference number E-MTAB-10836.

525

526

527

528 **References**

Barrionuevo, F. J., Zurita, F., Burgos, M., & Jiménez, R. (2004). Testis-like development of

gonads in female moles. New insights on mammalian gonad organogenesis.

*Developmental Biology*, 268(1), 39–52. <https://doi.org/10.1016/j.ydbio.2003.11.025>

Bogacka, I., Paukzsto, Ł., Jastrzębski, J. P., Czerwińska, J., Chojnowska, K., Kamińska, B., Kurzyńska, A., Smolińska, N., Gizejewski, Z., & Kamiński, T. (2017). Seasonal differences in the testicular transcriptome profile of free-living European beavers (*Castor fiber* L.) determined by the RNA-Seq method. *PLOS ONE*, 12(7), e0180323. <https://doi.org/10.1371/journal.pone.0180323>

Bose, R., Manku, G., Culty, M., & Wing, S. S. (2014). Ubiquitin–Proteasome System in Spermatogenesis. In P. Sutovsky (Ed.), *Posttranslational Protein Modifications in the Reproductive System* (pp. 181–213). Springer. [https://doi.org/10.1007/978-1-4939-0817-2\\_9](https://doi.org/10.1007/978-1-4939-0817-2_9)

Bronson, F. H., & Heideman, P. D. (1994). *The Physiology of Reproduction 2nd Edition*.

Cheng, J., Watkins, S. C., & Walker, W. H. (2007). Testosterone Activates Mitogen-Activated Protein Kinase via Src Kinase and the Epidermal Growth Factor Receptor in Sertoli Cells. *Endocrinology*, 148(5), 2066–2074. <https://doi.org/10.1210/en.2006-1465>

Crépieux, P., Marion, S., Martinat, N., Fafeur, V., Vern, Y. L., Kerboeuf, D., Guillou, F., & Reiter, E. (2001). The ERK-dependent signalling is stage-specifically modulated by FSH, during primary Sertoli cell maturation. *Oncogene*, 20(34), 4696–4709. <https://doi.org/10.1038/sj.onc.1204632>

Crépieux, P., Martinat, N., Marion, S., Guillou, F., & Reiter, E. (2002). Cellular Adhesion of Primary Sertoli Cells Affects Responsiveness of the Extracellular Signal-Regulated Kinases 1 and 2 to Follicle-Stimulating Hormone but Not to Epidermal Growth Factor. *Archives of Biochemistry and Biophysics*, 399(2), 245–250. <https://doi.org/10.1006/abbi.2002.2773>

Dadhich, R. K., Barrionuevo, F. J., Lupiañez, D. G., Real, F. M., Burgos, M., & Jiménez, R. (2011). Expression of Genes Controlling Testicular Development in Adult Testis of the Seasonally Breeding Iberian Mole. *Sexual Development*, 5(2), 77–88. <https://doi.org/10.1159/000323805>



- Dadhich, R. K., Barrionuevo, F. J., Real, F. M., Lupiañez, D. G., Ortega, E., Burgos, M., & Jiménez, R. (2013). Identification of Live Germ-Cell Desquamation as a Major Mechanism of Seasonal Testis Regression in Mammals: A Study in the Iberian Mole (*Talpa occidentalis*)<sup>1</sup>. *Biology of Reproduction*, *88*(4).  
<https://doi.org/10.1095/biolreprod.112.106708>
- Dadhich, R. K., Real, F. M., Zurita, F., Barrionuevo, F. J., Burgos, M., & Jiménez, R. (2010). Role of Apoptosis and Cell Proliferation in the Testicular Dynamics of Seasonal Breeding Mammals: A Study in the Iberian Mole, *Talpa occidentalis*<sup>1</sup>. *Biology of Reproduction*, *83*(1), 83–91. <https://doi.org/10.1095/biolreprod.109.080135>
- D'agostino, P., Milano, S., Barbera, C., Bella, G. D., Rosa, M. L., Ferlazzo, V., Farruggio, R., Miceli, D. M., Miele, M., Castagnetta, L., & Cillari, E. (1999). Sex Hormones Modulate Inflammatory Mediators Produced by Macrophages. *Annals of the New York Academy of Sciences*, *876*(1), 426–429. <https://doi.org/10.1111/j.1749-6632.1999.tb07667.x>
- Dardente, H., Lomet, D., Robert, V., Decourt, C., Beltramo, M., & Pellicer-Rubio, M.-T. (2016). Seasonal breeding in mammals: From basic science to applications and back. *Theriogenology*, *86*(1), 324–332. <https://doi.org/10.1016/j.theriogenology.2016.04.045>
- Das, G. K., & Khan, F. A. (2010). Summer anoestrus in buffalo—A review. *Reproduction in Domestic Animals = Zuchthygiene*, *45*(6), e483-494. <https://doi.org/10.1111/j.1439-0531.2010.01598.x>
- Engelberg, D. (2004). Stress-activated protein kinases—Tumor suppressors or tumor initiators? *Seminars in Cancer Biology*, *14*(4), 271–282.  
<https://doi.org/10.1016/j.semcancer.2004.04.006>
- Fijak, M., & Meinhardt, A. (2006). The testis in immune privilege. *Immunological Reviews*, *213*(1), 66–81. <https://doi.org/10.1111/j.1600-065X.2006.00438.x>
- Fix, C., Jordan, C., Cano, P., & Walker, W. H. (2004). Testosterone activates mitogen-activated protein kinase and the cAMP response element binding protein transcription factor in Sertoli cells. *PNAS*, *101*(30), 10919–10924.



<https://doi.org/10.1073/pnas.0404278101>

Foo, Y. Z., Nakagawa, S., Rhodes, G., & Simmons, L. W. (2017). The effects of sex hormones on immune function: A meta-analysis. *Biological Reviews*, 92(1), 551–571.

<https://doi.org/10.1111/brv.12243>

Garcia, T. X., DeFalco, T., Capel, B., & Hofmann, M.-C. (2013). Constitutive activation of NOTCH1 signaling in Sertoli cells causes gonocyte exit from quiescence. *Developmental Biology*, 377(1), 188–201. <https://doi.org/10.1016/j.ydbio.2013.01.031>

González, C. R., Isla, M. L. M., & Vitullo, A. D. (2018). The balance between apoptosis and autophagy regulates testis regression and recrudescence in the seasonal-breeding South American plains vizcacha, *Lagostomus maximus*. *PLOS ONE*, 13(1), e0191126.

<https://doi.org/10.1371/journal.pone.0191126>

Gorczyńska, E., & Handelsman, D. J. (1995). Androgens rapidly increase the cytosolic calcium concentration in Sertoli cells. *Endocrinology*, 136(5), 2052–2059.

<https://doi.org/10.1210/endo.136.5.7720654>

Green, C. D., Ma, Q., Manske, G. L., Shami, A. N., Zheng, X., Marini, S., Moritz, L., Sultan, C., Gurczynski, S. J., Moore, B. B., Tallquist, M. D., Li, J. Z., & Hammoud, S. S. (2018). A Comprehensive Roadmap of Murine Spermatogenesis Defined by Single-Cell RNA-Seq. *Developmental Cell*, 46(5), 651-667.e10.

<https://doi.org/10.1016/j.devcel.2018.07.025>

Hayden, M. S., & Ghosh, S. (2014). Regulation of NF- $\kappa$ B by TNF family cytokines. *Seminars in Immunology*, 26(3), 253–266. <https://doi.org/10.1016/j.smim.2014.05.004>

Hermann, B. P., Cheng, K., Singh, A., Roa-De La Cruz, L., Mutoji, K. N., Chen, I.-C., Gildersleeve, H., Lehle, J. D., Mayo, M., Westernströer, B., Law, N. C., Oatley, M. J., Velte, E. K., Niedenberger, B. A., Fritze, D., Silber, S., Geyer, C. B., Oatley, J. M., & McCarrey, J. R. (2018). The Mammalian Spermatogenesis Single-Cell Transcriptome, from Spermatogonial Stem Cells to Spermatids. *Cell Reports*, 25(6), 1650-1667.e8.

<https://doi.org/10.1016/j.celrep.2018.10.026>

Holdcraft, R. W., & Braun, R. E. (2004). Androgen receptor function is required in Sertoli cells

for the terminal differentiation of haploid spermatids. *Development*, 131(2), 459–467.

<https://doi.org/10.1242/dev.00957>

Howe, A. K., Aplin, A. E., & Juliano, R. L. (2002). Anchorage-dependent ERK signaling – mechanisms and consequences. *Current Opinion in Genetics & Development*, 12(1), 30–35. [https://doi.org/10.1016/S0959-437X\(01\)00260-X](https://doi.org/10.1016/S0959-437X(01)00260-X)

Jiménez, R., Burgos, M., & Barrionuevo, F. J. (2015). Circannual Testis Changes in Seasonally Breeding Mammals. *Sex Dev*, 9(4), 205–215.

<https://doi.org/10.1159/000439039>

Jimenez, R., Burgos, M., Sanchez, A., Sinclair, A. H., Alarcon, F. J., Marin, J. J., Ortega, E., & de la Guardia, R. D. (1993). Fertile females of the mole *Talpa occidentalis* are phenotypic intersexes with ovotestes. *Development*, 118(4), 1303–1311.

<https://doi.org/10.1242/dev.118.4.1303>

Lao-Pérez, M., Massoud, D., Real, F. M., Hurtado, A., Ortega, E., Burgos, M., Jiménez, R., & Barrionuevo, F. J. (2021). Mediterranean Pine Vole, *Microtus duodecimcostatus*: A Paradigm of an Opportunistic Breeder. *Animals: An Open Access Journal from MDPI*, 11(6), 1639. <https://doi.org/10.3390/ani11061639>

Li, N., Wang, T., & Han, D. (2012). Structural, cellular and molecular aspects of immune privilege in the testis. *Front. Immunol.*, 3. <https://doi.org/10.3389/fimmu.2012.00152>

Liao, Y., Smyth, G. K., & Shi, W. (2019). The R package Rsubread is easier, faster, cheaper and better for alignment and quantification of RNA sequencing reads. *Nucleic Acids Research*, 47(8), e47–e47. <https://doi.org/10.1093/nar/gkz114>

Luaces, J. P., Rossi, L. F., Merico, V., Zuccotti, M., Redi, C. A., Solari, A. J., Merani, M. S., & Garagna, S. (2013). Spermatogenesis is seasonal in the large hairy armadillo, *Chaetophractus villosus* (Dasypodidae, Xenarthra, Mammalia). *Reproduction, Fertility, and Development*, 25(3), 547–557. <https://doi.org/10.1071/RD12127>

Luaces, J. P., Rossi, L. F., Sciurano, R. B., Rebuzzini, P., Merico, V., Zuccotti, M., Merani, M. S., & Garagna, S. (2014). Loss of Sertoli-Germ Cell Adhesion Determines the Rapid Germ Cell Elimination During the Seasonal Regression of the Seminiferous Epithelium

of the Large Hairy Armadillo *Chaetophractus villosus*1. *Biology of Reproduction*, 90(3).

<https://doi.org/10.1095/biolreprod.113.113118>

Lui, W., Lee, W. M., & Cheng, C. Y. (2003a). Transforming Growth Factor  $\beta$ 3 Regulates the Dynamics of Sertoli Cell Tight Junctions Via the p38 Mitogen-Activated Protein Kinase Pathway1. *Biology of Reproduction*, 68(5), 1597–1612.

<https://doi.org/10.1095/biolreprod.102.011387>

Lui, W., Lee, W. M., & Cheng, C. Y. (2003b). Sertoli-Germ Cell Adherens Junction Dynamics in the Testis Are Regulated by RhoB GTPase via the ROCK/LIMK Signaling Pathway1. *Biology of Reproduction*, 68(6), 2189–2206.

<https://doi.org/10.1095/biolreprod.102.011379>

M Real, F., Haas, S. A., Franchini, P., Xiong, P., Simakov, O., Kuhl, H., Schöpflin, R., Heller, D., Moeinzadeh, M.-H., Heinrich, V., Krannich, T., Bressin, A., Hartmann, M. F., Wudy, S. A., Dechmann, D. K. N., Hurtado, A., Barrionuevo, F. J., Schindler, M., Harabula, I., ... Lupiáñez, D. G. (2020). The mole genome reveals regulatory rearrangements associated with adaptive intersexuality. *Science (New York, N.Y.)*, 370(6513), 208–214.

<https://doi.org/10.1126/science.aaz2582>

Martin, G. B., Tjondronegoro, S., & Blackberry, M. A. (1994). Effects of nutrition on testicular size and the concentrations of gonadotrophins, testosterone and inhibin in plasma of mature male sheep. *J Reprod Fertil*, 101(1), 121–128.

<https://doi.org/10.1530/jrf.0.1010121>

Martínez-Hernández, J., Seco-Rovira, V., Beltrán-Frutos, E., Ferrer, C., Serrano-Sánchez, M. I., & Pastor, L. M. (2020). Proliferation, apoptosis, and number of Sertoli cells in the Syrian hamster during recrudescence after exposure to short photoperiod†‡. *Biology of Reproduction*, 102(3), 588–597. <https://doi.org/10.1093/biolre/ioz198>

Massoud, D., Lao-Pérez, M., Hurtado, A., Abdo, W., Palomino-Morales, R., Carmona, F. D., Burgos, M., Jiménez, R., & Barrionuevo, F. J. (2018). Germ cell desquamation-based testis regression in a seasonal breeder, the Egyptian long-eared hedgehog, *Hemiechinus auritus*. *PloS One*, 13(10), e0204851.

<https://doi.org/10.1371/journal.pone.0204851>

- Massoud, D., Lao-Pérez, M., Ortega, E., Burgos, M., Jiménez, R., & Barrionuevo, F. J. (2021). Divergent Seasonal Reproductive Patterns in Syntopic Populations of Two Murine Species in Southern Spain, *Mus spretus* and *Apodemus sylvaticus*. *Animals*, *11*(2), 243. <https://doi.org/10.3390/ani11020243>
- Maywood, E. S., Chahad-Ehlers, S., Garabette, M. L., Pritchard, C., Underhill, P., Greenfield, A., Ebling, F. J. P., Akhtar, R. A., Kyriacou, C. P., Hastings, M. H., & Reddy, A. B. (2009). Differential Testicular Gene Expression in Seasonal Fertility. *Journal of Biological Rhythms*, *24*(2), 114–125. <https://doi.org/10.1177/0748730409332029>
- Meng, J., Greenlee, A. R., Taub, C. J., & Braun, R. E. (2011). Sertoli Cell-Specific Deletion of the Androgen Receptor Compromises Testicular Immune Privilege in Mice. *Biol Reprod*, *85*(2), 254–260. <https://doi.org/10.1095/biolreprod.110.090621>
- Nelson, R. J., Gubernick, D. J., & Blom, J. M. (1995). Influence of photoperiod, green food, and water availability on reproduction in male California mice (*Peromyscus californicus*). *Physiol Behav*, *57*(6), 1175–1180. [https://doi.org/10.1016/0031-9384\(94\)00380-n](https://doi.org/10.1016/0031-9384(94)00380-n)
- Ni, F.-D., Hao, S.-L., & Yang, W.-X. (2019). Multiple signaling pathways in Sertoli cells: Recent findings in spermatogenesis. *Cell Death Dis*, *10*(8), 541. <https://doi.org/10.1038/s41419-019-1782-z>
- Pastor, L. M., Zuasti, A., Ferrer, C., Bernal-Mañas, C. M., Morales, E., Beltrán-Frutos, E., & Seco-Rovira, V. (2011). Proliferation and Apoptosis in Aged and Photoregressed Mammalian Seminiferous Epithelium, with Particular Attention to Rodents and Humans. *Reproduction in Domestic Animals*, *46*(1), 155–164. <https://doi.org/10.1111/j.1439-0531.2009.01573.x>
- Paduch, D., Mielnik, A., & Schlegel, P. N. (2005). Novel mutations in testis-specific ubiquitin protease 26 gene may cause male infertility and hypogonadism. *Reproductive BioMedicine Online*, *10*(6), 747–754. [https://doi.org/10.1016/S1472-6483\(10\)61119-4](https://doi.org/10.1016/S1472-6483(10)61119-4)
- Robinson, M. D., McCarthy, D. J., & Smyth, G. K. (2010). edgeR: A Bioconductor package for

- differential expression analysis of digital gene expression data. *Bioinformatics*, 26(1), 139–140. <https://doi.org/10.1093/bioinformatics/btp616>
- Sakai, K., Ito, C., Wakabayashi, M., Kanzaki, S., Ito, T., Takada, S., Toshimori, K., Sekita, Y., & Kimura, T. (2019). Usp26 mutation in mice leads to defective spermatogenesis depending on genetic background. *Scientific Reports*, 9(1), 13757. <https://doi.org/10.1038/s41598-019-50318-6>
- Seco-Rovira, V., Beltrán-Frutos, E., Ferrer, C., Saez, F. J., Madrid, J. F., Canteras, M., & Pastor, L. M. (2015). Testicular histomorphometry and the proliferative and apoptotic activities of the seminiferous epithelium in Syrian hamster (*Mesocricetus auratus*) during regression owing to short photoperiod. *Andrology*, 3(3), 598–610. <https://doi.org/10.1111/andr.12037>
- Stupack, D. G., Cho, S. Y., & Klemke, R. L. (2000). Molecular signaling mechanisms of cell migration and invasion. *Immunologic Research*, 21(2), 83–88. <https://doi.org/10.1385/IR:21:2-3:83>
- Sun, Q. Y., Breitbart, H., & Schatten, H. (1999). Role of the MAPK cascade in mammalian germ cells. *Reproduction, Fertility and Development*, 11(8), 443–450. <https://doi.org/10.1071/rd00014>
- Sun, Y., Liu, W.-Z., Liu, T., Feng, X., Yang, N., & Zhou, H.-F. (2015). Signaling pathway of MAPK/ERK in cell proliferation, differentiation, migration, senescence and apoptosis. *Journal of Receptors and Signal Transduction*, 35(6), 600–604. <https://doi.org/10.3109/10799893.2015.1030412>
- Temple, J. L. (2004). The musk shrew (*Suncus murinus*): A model species for studies of nutritional regulation of reproduction. *ILAR J*, 45(1), 25–34. <https://doi.org/10.1093/ilar.45.1.25>
- Trigunaite, A., Dimo, J., & Jørgensen, T. N. (2015). Suppressive effects of androgens on the immune system. *Cellular Immunology*, 294(2), 87–94. <https://doi.org/10.1016/j.cellimm.2015.02.004>
- Tsubota, T., Howell-Skalla, L., Nitta, H., Osawa, Y., Mason, J. I., Meiers, P. G., Nelson, R. A.,

- & Bahr, J. M. (1997). Seasonal changes in spermatogenesis and testicular steroidogenesis in the male black bear *Ursus americanus*. *Journal of Reproduction and Fertility*, *109*(1), 21–27. <https://doi.org/10.1530/jrf.0.1090021>
- Wang, X., Adegoke, E. O., Ma, M., Huang, F., Zhang, H., Adeniran, S. O., Zheng, P., & Zhang, G. (2019). Influence of Wilms' tumor suppressor gene WT1 on bovine Sertoli cells polarity and tight junctions via non-canonical WNT signaling pathway. *Theriogenology*, *138*, 84–93. <https://doi.org/10.1016/j.theriogenology.2019.07.007>
- Wang, Y., Zhang, J., Yi, X., & Yu, F.-S. X. (2004). Activation of ERK1/2 MAP kinase pathway induces tight junction disruption in human corneal epithelial cells. *Experimental Eye Research*, *78*(1), 125–136. <https://doi.org/10.1016/j.exer.2003.09.002>
- Wang, Y.-J., Jia, G.-X., Yan, R.-G., Guo, S.-C., Tian, F., Ma, J.-B., Zhang, R.-N., Li, C., Zhang, L.-Z., Du, Y.-R., & Yang, Q.-E. (2019). Testosterone-retinoic acid signaling directs spermatogonial differentiation and seasonal spermatogenesis in the Plateau pika (*Ochotona curzoniae*). *Theriogenology*, *123*, 74–82. <https://doi.org/10.1016/j.theriogenology.2018.09.033>
- Wong, C., Mruk, D. D., Lui, W., & Cheng, C. Y. (2004). Regulation of blood-testis barrier dynamics: An in vivo study. *Journal of Cell Science*, *117*(5), 783–798. <https://doi.org/10.1242/jcs.00900>
- Wong, C.-H., & Yan Cheng, C. (2005). Mitogen-activated protein kinases, adherens junction dynamics, and spermatogenesis: A review of recent data. *Developmental Biology*, *286*(1), 1–15. <https://doi.org/10.1016/j.ydbio.2005.08.001>
- Wosnitzer, M. S., Mielnik, A., Dabaja, A., Robinson, B., Schlegel, P. N., & Paduch, D. A. (2014). Ubiquitin Specific Protease 26 (USP26) Expression Analysis in Human Testicular and Extragonadal Tissues Indicates Diverse Action of USP26 in Cell Differentiation and Tumorigenesis. *PLOS ONE*, *9*(6), e98638. <https://doi.org/10.1371/journal.pone.0098638>
- Young, K. A., & Nelson, R. J. (2001). Mediation of seasonal testicular regression by apoptosis. *REPRODUCTION-CAMBRIDGE-*, *122*(5), 677–685.

Yu, G., Wang, L.-G., Han, Y., & He, Q.-Y. (2012). clusterProfiler: An R Package for Comparing Biological Themes Among Gene Clusters. *OMICS: A Journal of Integrative Biology*, 16(5), 284–287. <https://doi.org/10.1089/omi.2011.0118>

Zhang, H., Yin, Y., Wang, G., Liu, Z., Liu, L., & Sun, F. (2014). Interleukin-6 disrupts blood-testis barrier through inhibiting protein degradation or activating phosphorylated ERK in Sertoli cells. *Scientific Reports*, 4(1), 4260. <https://doi.org/10.1038/srep04260>

Zhao, S., Zhu, W., Xue, S., & Han, D. (2014). Testicular defense systems: Immune privilege and innate immunity. *Cellular & Molecular Immunology*, 11(5), 428–437. <https://doi.org/10.1038/cmi.2014.38>

529

530

531

532

533

534

535

536

537

538

539

540

541

542



543 **Figures**

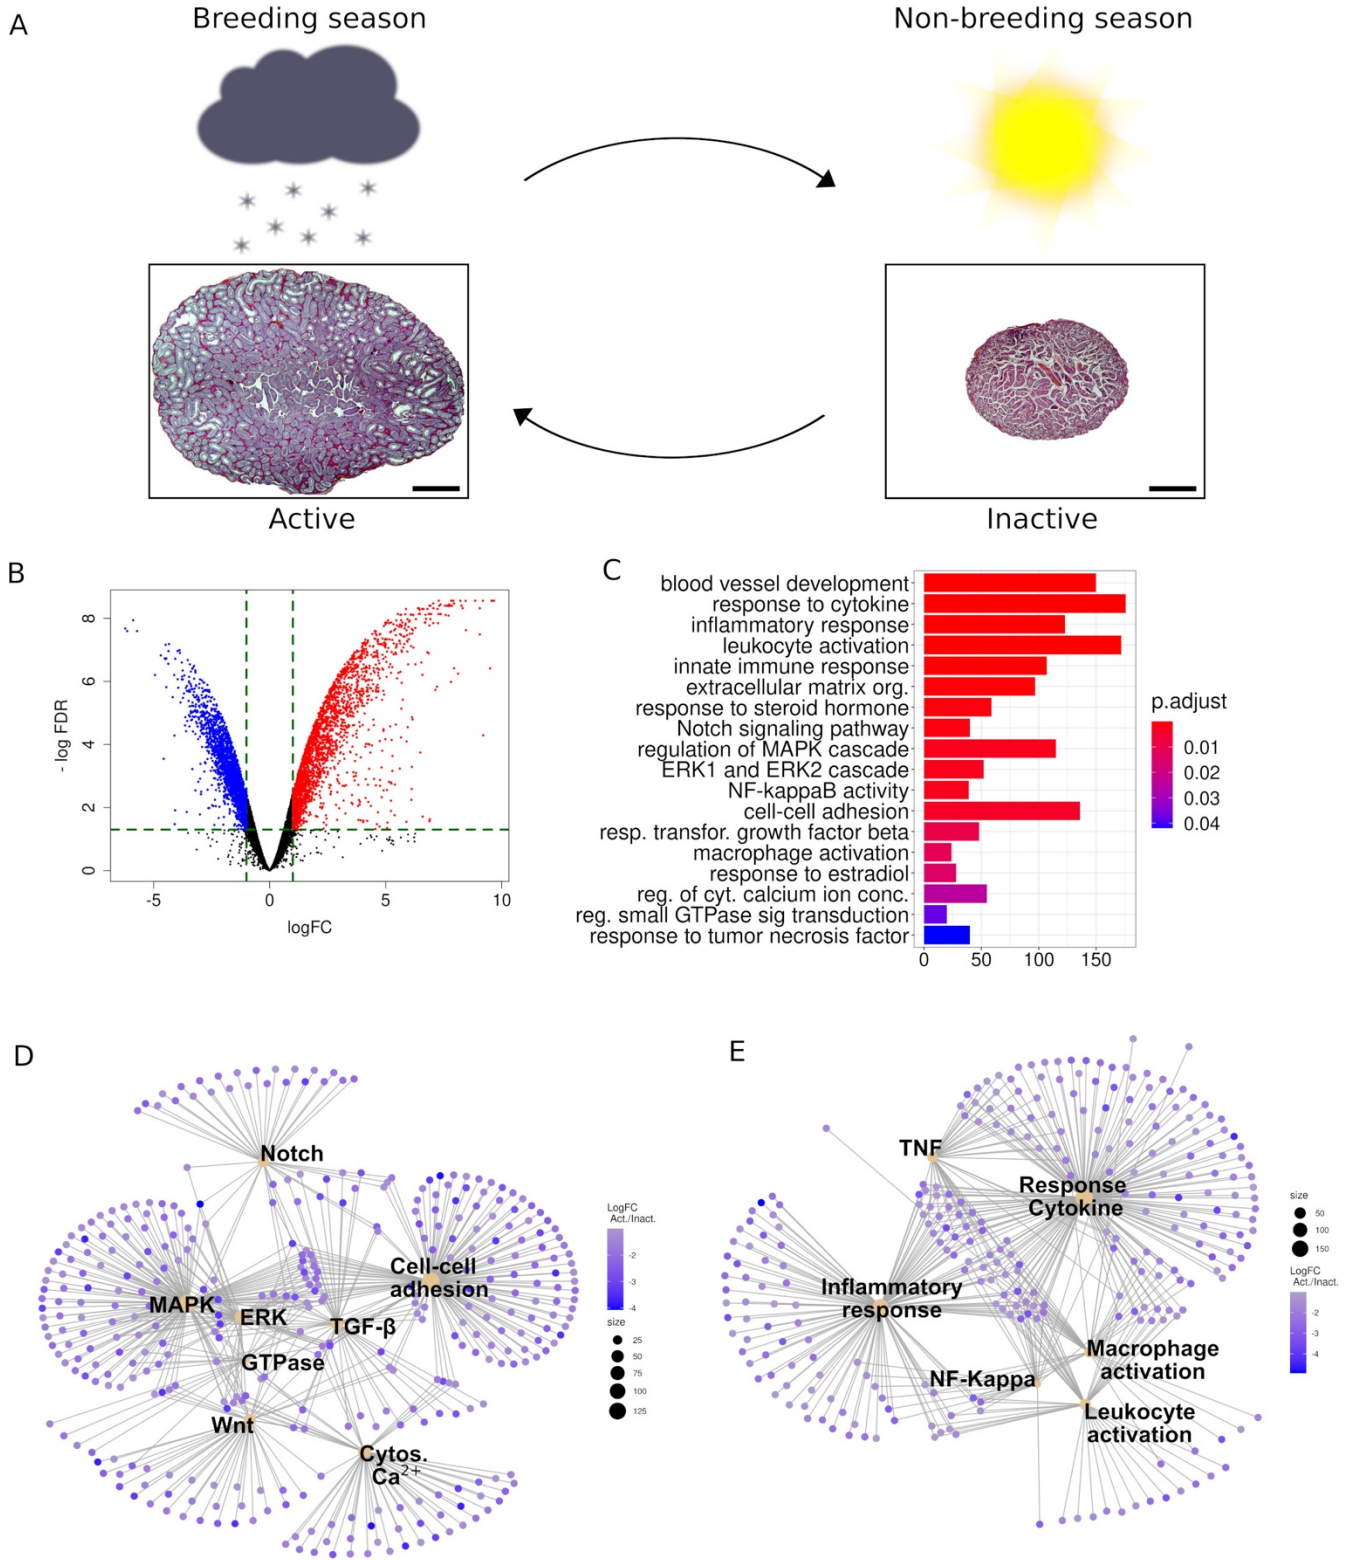

544



545 **Figure 1. Transcriptomic analysis of seasonally active and inactive testes of *Talpa***  
546 ***occidentalis*.** Low magnification of hematoxylin and eosin-stained histological sections of  
547 seasonally active and inactive testes of the Iberian mole during the breeding (winter) and non-  
548 breeding (summer) seasons (A). Note the pronounced reduction in testis size occurring during  
549 seasonal testis regression in this species. Scale bars represent 1mm. (B) Volcano plot of the  
550 differential gene expression between active and inactive testes after normalization for different  
551 contents in germ cells. (C) Gene ontology analysis of the deregulated genes revealed a  
552 significant enrichment ( $P_{\text{adjust}} < 0.05$ ) in biological processes and molecular pathways  
553 associated to normal testicular functions. (D) Cnetplot of several significantly enriched  
554 molecular pathways identified in our GO analysis. (E) Gene-concept analysis of several  
555 significantly enriched GO terms associated with the activation of the immune system. In  
556 pictures (C, D, and E) red colour indicates downregulation and bluish colour upregulation  
557 during testis regression. In figures (D and E), the size of sepia circles is proportional to the  
558 number of deregulated genes they represent.

559

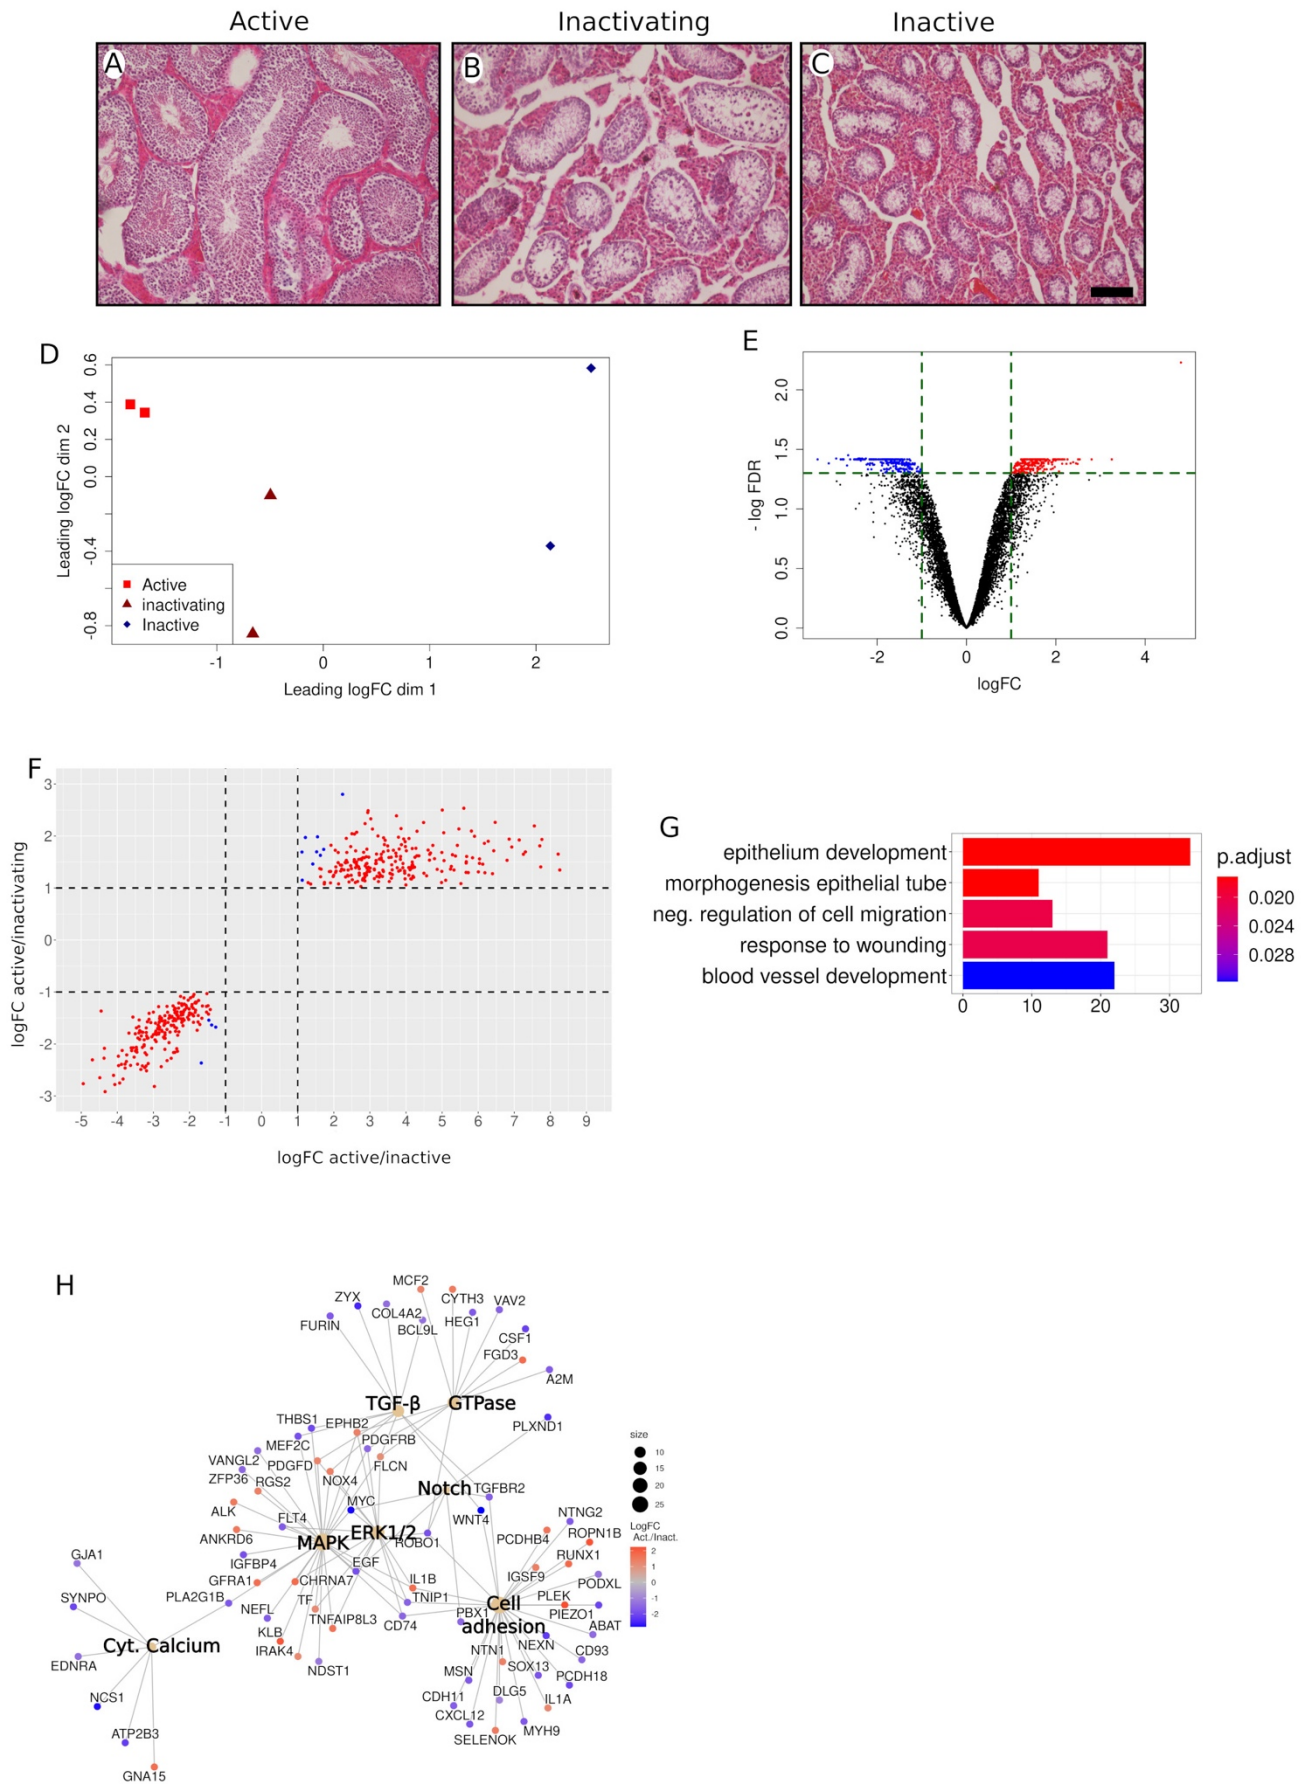

561 **Figure 2. Transcriptomic analysis of regressing (inactivating) testes of *T. occidentalis*.**

562 (A-C) Hematoxylin and eosin-stained histological sections of active (A), regressing (B) and

563 inactive (C) testes of the Iberian mole. Note that seminiferous tubules of regressing testes

564 have an intermediate size between those of active and inactive ones. (D) Multidimensional

565 scaling plot of replicate samples of testes. Note that the regressing samples are placed

566 between the active and inactive ones. (E) Volcano plot of the differentially expressed genes

567 between active and regressing testes. (F) Log<sub>2</sub> fold change scatterplot representing the

568 differentially expressed genes detected in the comparison between active and inactive testes

569 against those observed in the comparison between active and regressing ones. (G) GO

570 analysis of the deregulated genes identified in the comparison between active and regressing

571 testes. (H) Gene-concept analysis of differentially expressed genes belonging to several

572 molecular pathways. In pictures E and H, red colour indicates gene downregulation and bluish

573 colour upregulation during testis regression. In figure (H), the size of sepia circles is

574 proportional to the number of deregulated genes they represent. Scale bar in C represents

575 100 µm for A-C.

576

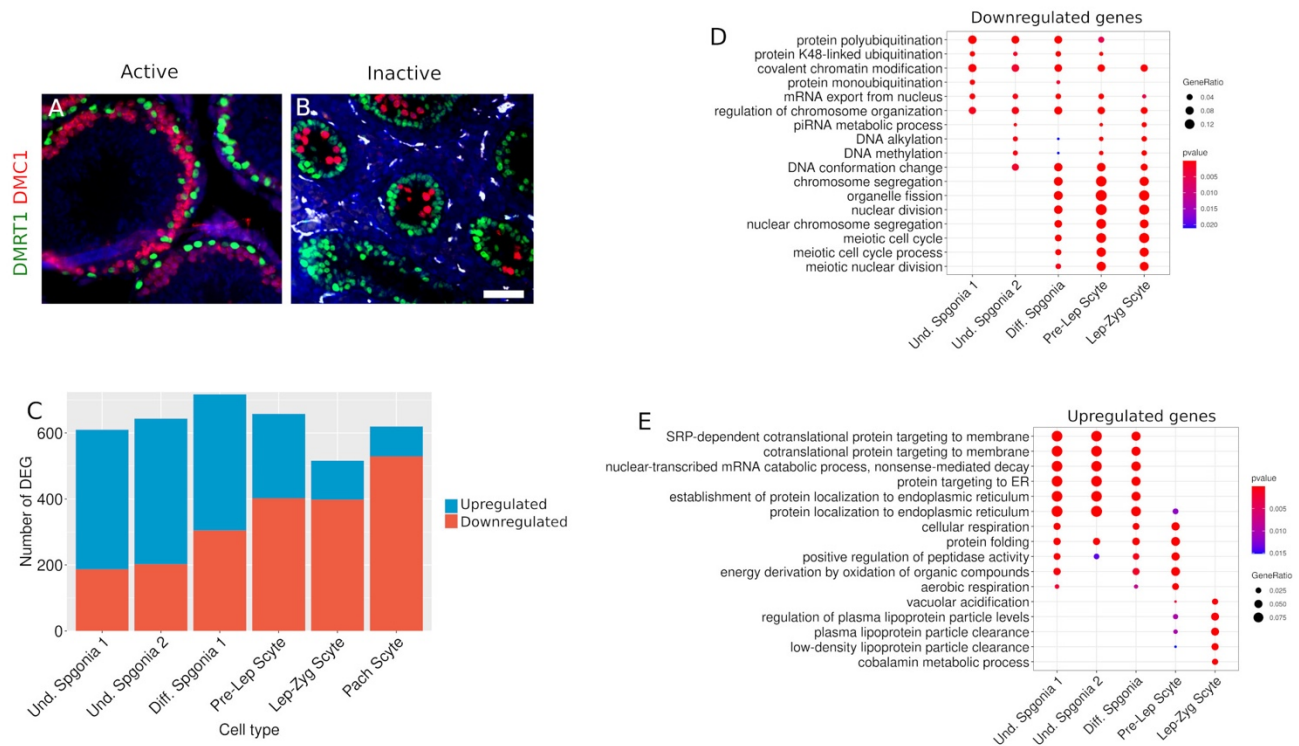

577

578 **Figure 3. Transcriptomic analysis of early spermatogenesis in the inactive testis of *T.***

579 ***occidentalis*.** Double immunofluorescence for DMRT1 (a marker for both Sertoli and

580 spermatogonial cells) and for DMC1 (a marker for zygotene and early pachytene

581 spermatocytes) in active (A) and inactive (B) testes. Note that the number of primary

582 spermatocytes (red cells) is highly reduced in the inactive testis. (C) Number of genes

583 predicted to be deregulated in each of the cell types of the early spermatogenic stages in the

584 inactive testes of *T. occidentalis*. (D) Biological theme comparison of genes downregulated

585 during testis regression in the early stages of spermatogenesis of the Iberian mole. (E)

586 Biological theme comparison of genes upregulated during testis regression in the early stages

587 of spermatogenesis of the Iberian mole. Scale bar in B represents 50 µm for A and B.

588

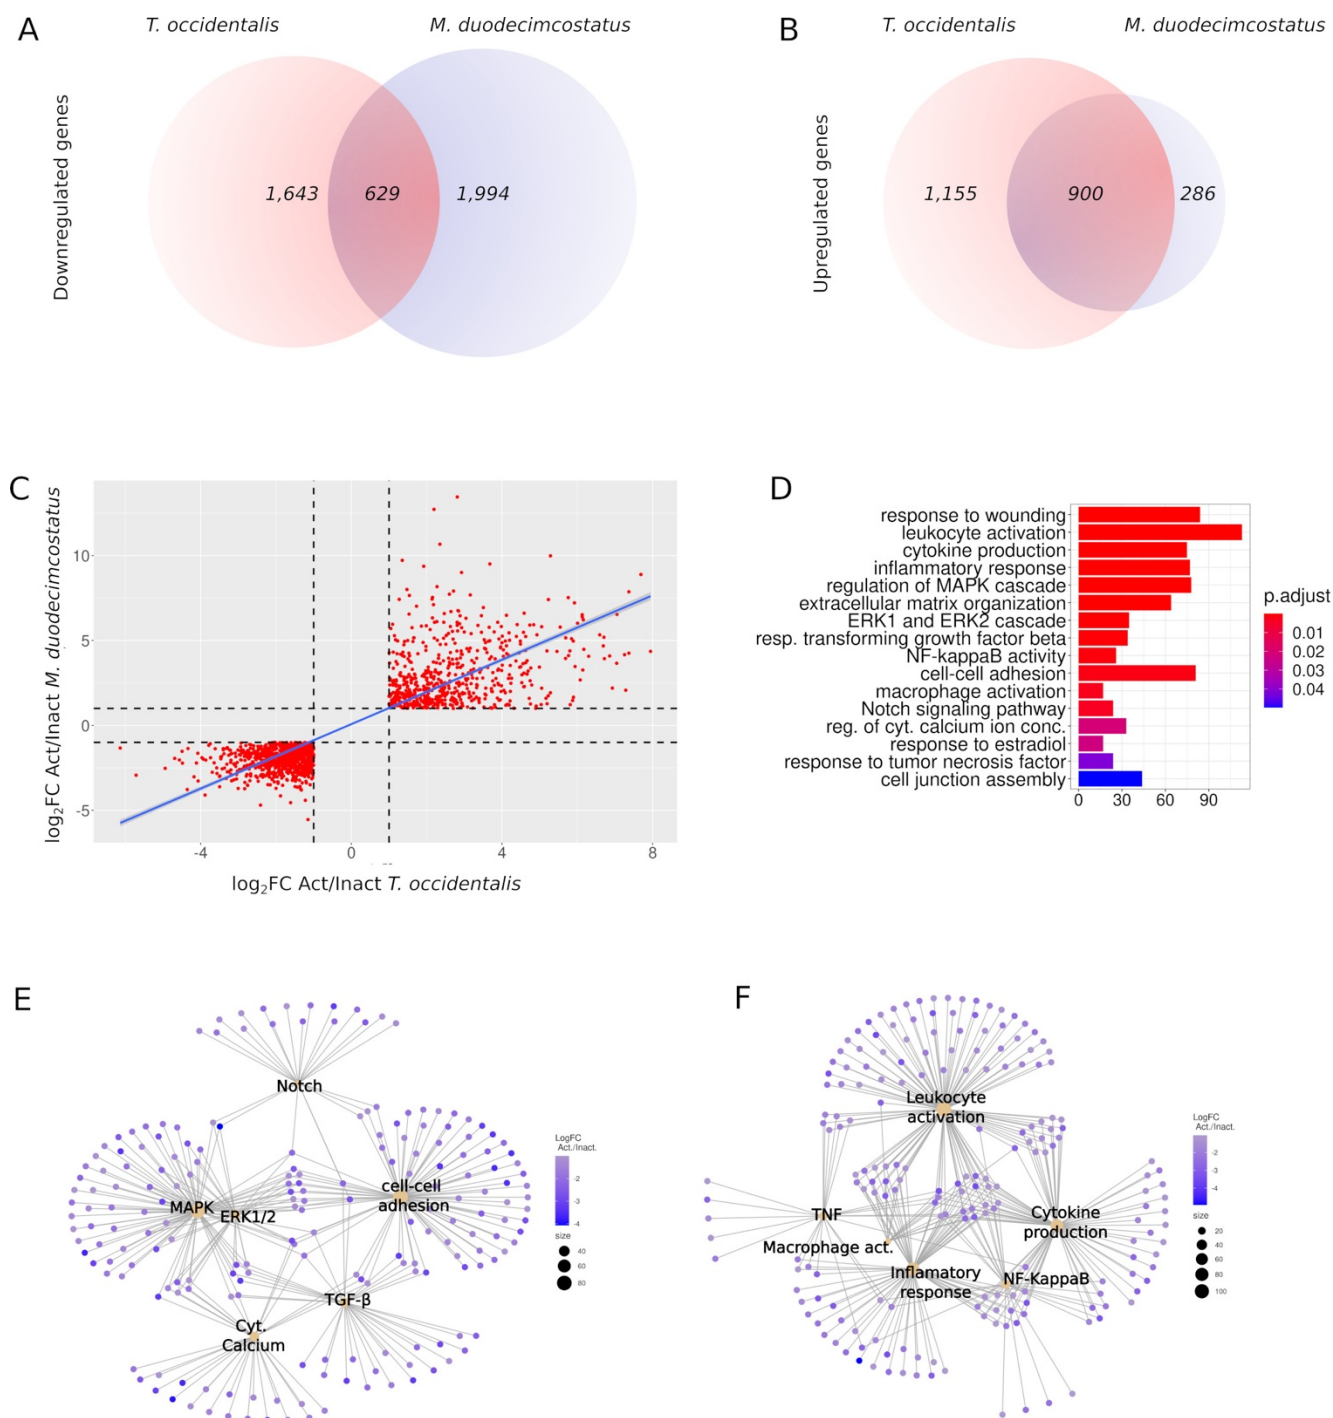

589

590 **Figure 4. Biological functions altered in the inactive testes of both *Talpa occidentalis***

591 **and *Microtus duodecimcostatus*.** (A, B) Venn-diagram representing the numbers of

592 common genes downregulated (A) and upregulated (B) during testis regression. (C) Log<sub>2</sub> fold

593 change scatterplot representing the differential gene expression between active and inactive

594 testes of *T. occidentalis* against the same data from *M. duodecimcostatus*. (D) Gene ontology

595 analysis of DEGs shared by both *T. occidentalis* and *M. duodecimcostatus*. (E) Gene-  
596 concept analysis of several significantly enriched GO terms associated with known molecular  
597 pathways acting in the testes of both species. (F) Gene-concept analysis of several  
598 significantly enriched GO terms associated with the activation of the immune response in both  
599 species. In pictures E and F, red colour indicates downregulation and bluish colour  
600 upregulation of genes during testis regression, and the size of sepia circles is proportional to  
601 the number of deregulated genes they represent.  
602





620

621

622

623

624

625

626

627

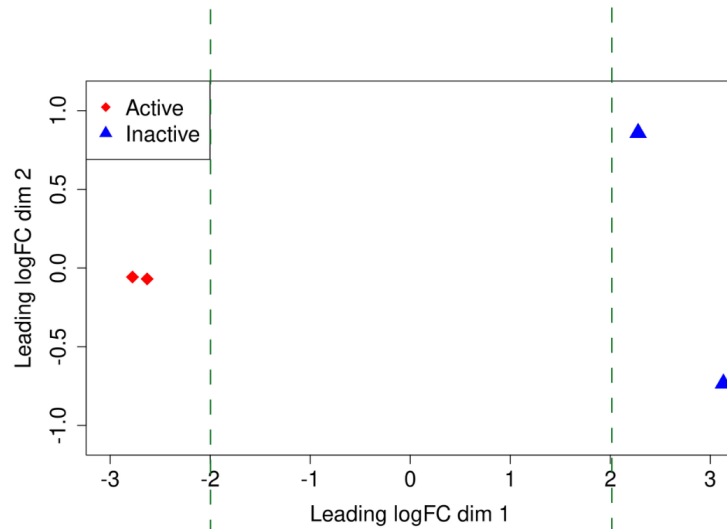

628

629

630

631

632

633

634

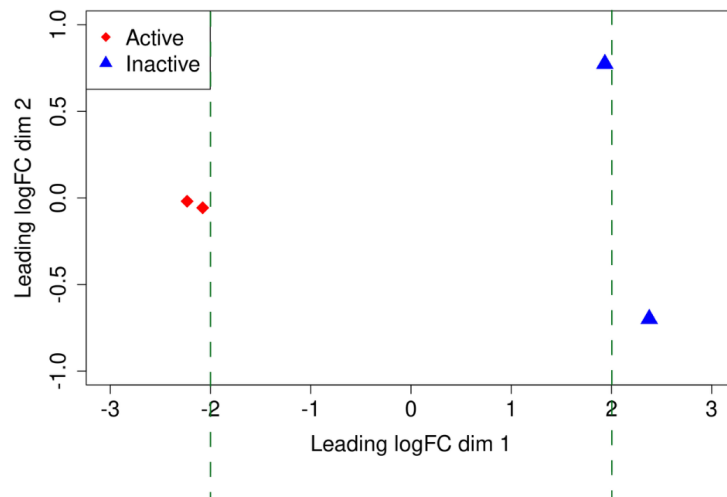

635

636

637 **Supporting Figure 2.** Multidimensional scaling plot of the replicate samples from seasonally

638 active and inactive testes used in this transcriptomic study before (upper panel) and after

639 (lower panel) germ cell contents normalization. Note that, after normalization, the distance

640 between active and inactive samples is reduced.



641

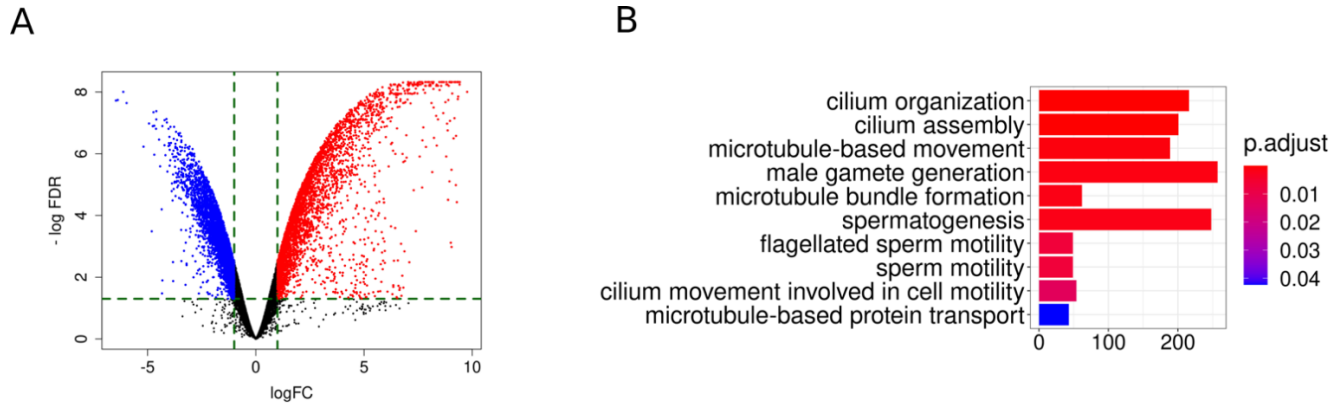

642

643 **Supporting Figure 3.** Transcriptomic analysis of seasonally active and inactive testes of *T.*  
644 *occidentalis* before normalization. (A) Volcano plot of differentially expressed genes before  
645 normalization. (B) Gene ontology analysis of the deregulated genes revealed a significant  
646 enrichment ( $P_{\text{adjust}} < 0.05$ ) in biological processes and molecular pathways associated to  
647 late stages of the spermatogenic cycle.
